# Supplementary material for: The Clustering of Adverse Childhood Experiences in the Avon Longitudinal Study of Parents and Children: Are Gender and Poverty Important?
Source: PubMed Central journal article supplement (PMC8918866; doi:10.1177/0886260520935096), 2020-07-08
Supplement: sj-pdf-1-jiv-10.1177_0886260520935096.pdf [file sj-pdf-1-jiv-10.1177_0886260520935096.pdf]

## Appendix A Information on childhood adversities used and their collection in ALSPAC









Appendix B – Comparing different latent class solutions

|                                        | <b>5 class solution</b> | <b>4 class solution</b> | <b>3 class solution</b> | <b>2 class solution</b> |
|----------------------------------------|-------------------------|-------------------------|-------------------------|-------------------------|
| <i>% of participants in each class</i> |                         |                         |                         |                         |
| Class 1                                | <b>6.4</b>              | 29.2                    | 26.3                    | 26.5                    |
| Class 2                                | <b>15.3</b>             | 7.1                     | 12.1                    | 73.5                    |
| Class 3                                | <b>5.7</b>              | 6.9                     | 61.7                    |                         |
| Class 4                                | <b>54.4</b>             | 56.8                    |                         |                         |
| Class 5                                | <b>18.2</b>             |                         |                         |                         |
| <i>Model fit indices</i>               |                         |                         |                         |                         |
| BIC                                    | <b>84907.5</b>          | 84942.7                 | 85046.9                 | 85327.2                 |
| SSABIC                                 | <b>84720.0</b>          | 84793.3                 | 84935.7                 | 85254.1                 |
| AIC                                    | <b>84491.2</b>          | 84611.0                 | 84800.0                 | 85164.9                 |
| Log likelihood                         | <b>-42186.6</b>         | -42258.5                | -42365.0                | -42559.5                |
| Entropy                                | <b>0.65</b>             | 0.67                    | 0.64                    | 0.69                    |

Appendix C Associations between gender and poverty with childhood adversities in ALSPAC

|                                 | <b>Gender<br/>OR (95% CI)<br/>Girls vs boys</b> | <b>Poverty<br/>OR (95% CI)<br/>Poverty vs no poverty</b> |
|---------------------------------|-------------------------------------------------|----------------------------------------------------------|
| Parental separation             | 1.06 (0.93, 1.20)                               | <b>2.63 (2.20, 3.14)</b>                                 |
| Death of close family member    | 1.19 (0.79, 1.77)                               | 1.13 (0.48, 2.66)                                        |
| Inter-parental violence         | 0.98 (0.83, 1.15)                               | <b>2.02 (1.61, 2.54)</b>                                 |
| Physical abuse                  | <b>0.80 (0.66, 0.96)</b>                        | <b>1.77 (1.40, 2.24)</b>                                 |
| Sexual abuse                    | <b>3.88 (2.41, 6.22)</b>                        | <b>2.38 (1.62, 3.52)</b>                                 |
| Emotional abuse                 | 0.92 (0.83, 1.03)                               | <b>2.00 (1.70, 2.35)</b>                                 |
| Parental convictions            | 1.16 (0.97, 1.39)                               | <b>1.73 (1.22, 2.47)</b>                                 |
| Mother's mental health problems | 1.01 (0.92, 1.12)                               | <b>2.30 (1.93, 2.74)</b>                                 |
| Father's mental health problems | 1.07 (0.92, 1.24)                               | <b>1.81 (1.29, 2.55)</b>                                 |
| Parental drug use               | 1.02 (0.86, 1.22)                               | <b>2.26 (1.83, 2.80)</b>                                 |
| Parental alcohol problems       | 1.15 (0.96, 1.38)                               | <b>1.64 (1.27, 2.11)</b>                                 |
